# Supplementary material for: Deep sequencing of large library selections allows computational discovery of diverse sets of zinc fingers that bind common targets
Source: PubMed Central journal article supplement (PMC3919609; doi:10.1093/nar/gkt1034), 2013-11-07

Figure S4

C - RTLNASR - TEST - ARLNDSR - N

C - RTLNASR - TEST - RTLEDSR - N

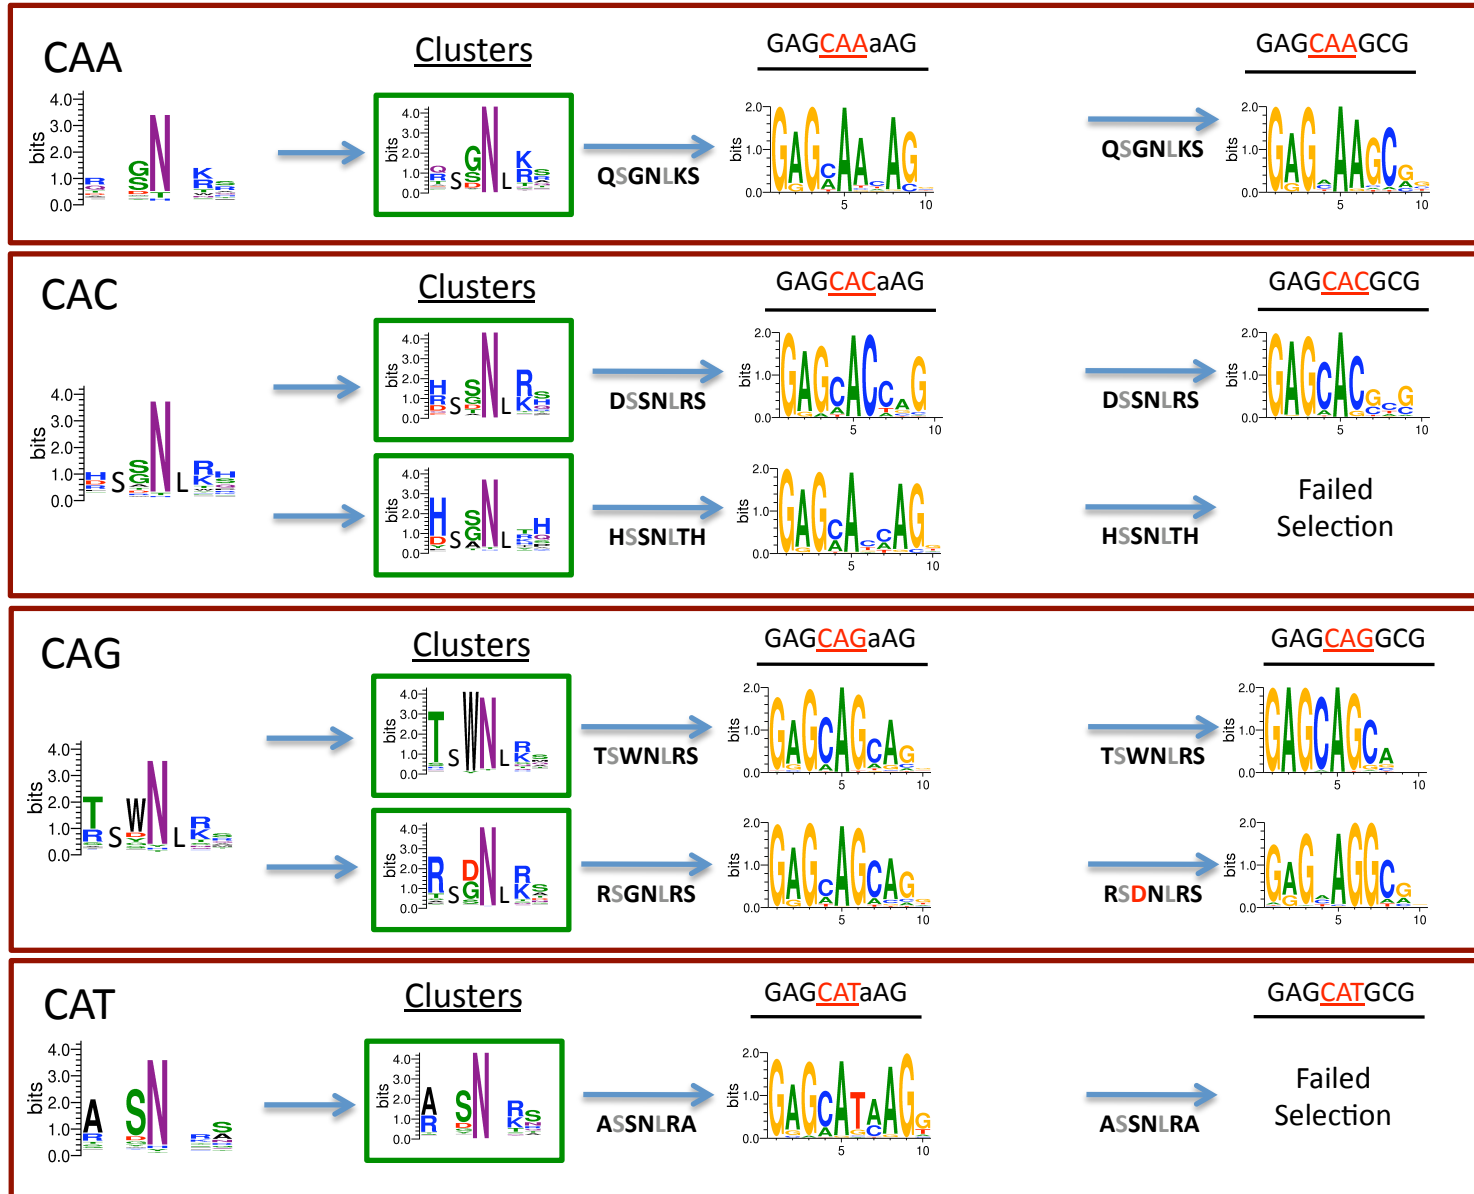

Supplement: supp_gkt1034_nar-02486-z-2013-File013.pdf [file supp_gkt1034_nar-02486-z-2013-File013.pdf]
